# Supplementary material for: Intelligence is associated with the modular structure of intrinsic brain networks
Source: PubMed Central journal article supplement (PMC5700184; doi:10.1038/s41598-017-15795-7), 2017-11-22
Supplement: 41598_2017_15795_MOESM1_ESM.pdf [file 41598_2017_15795_MOESM1_ESM.pdf]

## SUPPLEMENTARY MATERIAL

### **Intelligence is associated with the modular structure of intrinsic brain networks**

Kirsten Hilger<sup>1,2,\*</sup>, Matthias Ekman<sup>3</sup>, Christian J. Fiebach<sup>1,2,3</sup>, Ulrike Basten<sup>1</sup>

<sup>1</sup> Goethe University Frankfurt, Frankfurt am Main, Germany

<sup>2</sup> IDeA Center for Individual Development and Adaptive Education, Frankfurt am Main, Germany

<sup>3</sup> Donders Institute for Brain, Cognition, and Behaviour, Radboud University Nijmegen, The Netherlands

\* Corresponding author:

Kirsten Hilger  
Goethe University  
Department of Psychology  
Theodor-W.-Adorno-Platz 6, PEG  
D-60323 Frankfurt am Main  
Phone: +49 (0)69 / 798 - 35345  
hilger@psych.uni-frankfurt.de

**Supplementary Table S1.** Descriptive statistics for global graph metrics at different graph thresholds.

|                                   | <i>Thr</i> | <i>M</i> | <i>SD</i> | <i>Min</i> | <i>Max</i> |
|-----------------------------------|------------|----------|-----------|------------|------------|
| <i>Global modularity Q</i>        |            |          |           |            |            |
|                                   | 10 %       | .464     | .037      | .258       | .578       |
|                                   | 15 %       | .408     | .034      | .208       | .532       |
|                                   | 20 %       | .365     | .034      | .207       | .497       |
|                                   | 25 %       | .330     | .035      | .201       | .462       |
|                                   | 30 %       | .300     | .034      | .212       | .441       |
| <i>Number of modules</i>          |            |          |           |            |            |
|                                   | 10 %       | 4.20     | .595      | 3          | 6          |
|                                   | 15 %       | 3.74     | .556      | 3          | 5          |
|                                   | 20 %       | 3.41     | .512      | 2          | 5          |
|                                   | 25 %       | 3.21     | .434      | 2          | 5          |
|                                   | 30 %       | 3.14     | .353      | 2          | 4          |
| <i>Module size</i>                |            |          |           |            |            |
|                                   | 10 %       | 1314.41  | 192.82    | 897.67     | 1803.67    |
|                                   | 15 %       | 1478.55  | 229.27    | 1075.00    | 1803.67    |
|                                   | 20 %       | 1620.88  | 232.83    | 1077.29    | 2704.00    |
|                                   | 25 %       | 1709.22  | 204.54    | 1078.60    | 2704.00    |
|                                   | 30 %       | 1742.16  | 165.25    | 1332.00    | 2672.50    |
| <i>Variability in module size</i> |            |          |           |            |            |
|                                   | 10 %       | 376.96   | 183.08    | 34.00      | 932.69     |
|                                   | 15 %       | 368.27   | 183.06    | 27.64      | 1031.39    |
|                                   | 20 %       | 368.27   | 182.86    | 15.06      | 1138.56    |
|                                   | 25 %       | 360.02   | 223.71    | 13.82      | 1222.94    |
|                                   | 30 %       | 397.72   | 276.54    | 11.05      | 1300.46    |

*Thr*, proportional threshold applied on the binarised adjacency matrix; *M*, mean, *SD*, standard deviation; *Min*, minimum; *Max*, maximum.

**Supplementary Table S2.** Associations between intelligence (WASI FSIQ) and whole-brain aspects of modular organization across thresholds.

|                                   | <i>Thr</i> | <i>r<sub>part.</sub></i> | <i>p<sub>part.</sub></i> | <b>BF<sub>01</sub>-Reg.</b> |
|-----------------------------------|------------|--------------------------|--------------------------|-----------------------------|
| <i>Global Modularity Q</i>        |            |                          |                          |                             |
|                                   | 10 %       | .042                     | .470                     | 2.884                       |
|                                   | 15 %       | .004                     | .952                     | 3.665                       |
|                                   | 20 %       | .025                     | .669                     | 3.369                       |
|                                   | 25 %       | .057                     | .327                     | 2.369                       |
|                                   | 30 %       | .046                     | .432                     | 2.772                       |
| <i>Number of modules</i>          |            |                          |                          |                             |
|                                   | 10 %       | .085                     | .144                     | 1.384                       |
|                                   | 15 %       | .095                     | .099                     | 1.060                       |
|                                   | 20 %       | -.045                    | .441                     | 2.803                       |
|                                   | 25 %       | .041                     | .480                     | 2.914                       |
|                                   | 30 %       | -.099                    | .088                     | 0.970                       |
| <i>Module size</i>                |            |                          |                          |                             |
|                                   | 10 %       | -.089                    | .122                     | 1.226                       |
|                                   | 15 %       | -.088                    | .127                     | 1.311                       |
|                                   | 20 %       | .029                     | .610                     | 3.251                       |
|                                   | 25 %       | -.063                    | .277                     | 2.113                       |
|                                   | 30 %       | .099                     | .088                     | 0.971                       |
| <i>Variability in module size</i> |            |                          |                          |                             |
|                                   | 10 %       | .035                     | .550                     | 3.128                       |
|                                   | 15 %       | .098                     | .091                     | 0.985                       |
|                                   | 20 %       | -.014                    | .813                     | 3.592                       |
|                                   | 25 %       | .005                     | .926                     | 3.635                       |
|                                   | 30 %       | -.033                    | .569                     | 3.130                       |

*Thr*, proportional threshold applied on the binarised adjacency matrix; *r<sub>part.</sub>*, Pearson's correlation coefficient for the partial correlation controlling for effects of age, sex, and handedness; *p<sub>part.</sub>*, *p*-value of significance for the partial-correlation; BF<sub>01</sub>-Reg., Bayes Factor in favour of the null hypothesis (i.e., absence of correlation) for Bayes linear regression models predicting FSIQ values by the respective whole-brain measure of modular network organization while controlling for effects of age, sex, and handedness.

**Supplementary Table S3.** Associations between intelligence (WASI FSIQ) and whole-brain node type proportions at different graph thresholds.

|                                | <i>Thr</i> | <i>r<sub>part</sub></i> | <i>p<sub>part</sub></i> | <b>BF<sub>01</sub>-Reg.</b> |
|--------------------------------|------------|-------------------------|-------------------------|-----------------------------|
| <i>Ultra-peripheral nodes</i>  |            |                         |                         |                             |
|                                | 10 %       | .030                    | .610                    | 3.238                       |
|                                | 15 %       | .015                    | .801                    | 3.557                       |
|                                | 20 %       | -.057                   | .327                    | 2.379                       |
|                                | 25 %       | -.028                   | .632                    | 3.275                       |
|                                | 30 %       | .021                    | .723                    | 3.499                       |
| <i>Peripheral nodes</i>        |            |                         |                         |                             |
|                                | 10 %       | .062                    | .287                    | 2.184                       |
|                                | 15 %       | .070                    | .226                    | 1.883                       |
|                                | 20 %       | -.050                   | .390                    | 2.621                       |
|                                | 25 %       | .062                    | .284                    | 2.177                       |
|                                | 30 %       | .102                    | .078                    | 0.890                       |
| <i>Non-hub connector nodes</i> |            |                         |                         |                             |
|                                | 10 %       | -.020                   | .728                    | 3.491                       |
|                                | 15 %       | -.045                   | .439                    | 2.805                       |
|                                | 20 %       | -.013                   | .819                    | 3.613                       |
|                                | 25 %       | -.031                   | .594                    | 3.241                       |
|                                | 30 %       | -.027                   | .642                    | 3.342                       |
| <i>Non-hub kinless nodes</i>   |            |                         |                         |                             |
|                                | 10 %       | .023                    | .694                    | 3.438                       |
|                                | 15 %       | .062                    | .280                    | 2.161                       |
|                                | 20 %       | .104                    | .071                    | 0.832                       |
|                                | 25 %       | .009                    | .882                    | 3.647                       |
|                                | 30 %       | -.135                   | .020*                   | 0.305                       |
| <i>Provincial hubs</i>         |            |                         |                         |                             |
|                                | 10 %       | .010                    | .860                    | 3.637                       |
|                                | 15 %       | .024                    | .675                    | 3.369                       |

|                       |      |       |      |       |
|-----------------------|------|-------|------|-------|
|                       | 20 % | -.046 | .421 | 2.745 |
|                       | 25 % | .045  | .433 | 2.783 |
|                       | 30 % | .027  | .640 | 3.028 |
| <i>Connector hubs</i> |      |       |      |       |
|                       | 10 % | .011  | .852 | 3.631 |
|                       | 15 % | -.031 | .596 | 3.244 |
|                       | 20 % | -.040 | .489 | 2.963 |
|                       | 25 % | -.040 | .493 | 2.977 |
|                       | 30 % | -.015 | .796 | 3.578 |
| <i>Kinless hubs</i>   |      |       |      |       |
|                       | 10 % | .001  | .991 | 3.672 |
|                       | 15 % | .058  | .322 | 2.342 |
|                       | 20 % | .068  | .239 | 1.956 |
|                       | 25 % | .032  | .578 | 3.186 |
|                       | 30 % | -.033 | .568 | 3.380 |

---

*Thr*, proportional threshold applied on the binarised adjacency matrix;  $r_{part.}$ , Pearson's correlation coefficient for the partial correlation controlling for effects of age, sex, and handedness;  $p_{part.}$ ,  $p$ -value of significance for the partial-correlation;  $BF_{01-Reg.}$ , Bayes Factor in favour of the null hypothesis (i.e., absence of correlation) for Bayes linear regression models predicting FSIQ values by the respective node-type proportion while controlling for effects of age, sex, and handedness.

**Supplementary Table S4.** Associations between intelligence (WASI FSIQ) and whole-brain aspects of modular organization based on weighted graphs.

|                                              | $r_{part.}$ | $p_{part.}$ | $BF_{01-Reg.}$ |
|----------------------------------------------|-------------|-------------|----------------|
| <i>Whole-brain measures</i>                  |             |             |                |
| global modularity                            | .03         | .632        | 3.31           |
| number of modules                            | .10         | .094        | 1.02           |
| average module size                          | -.10        | .094        | 1.19           |
| variability in module size                   | .08         | .170        | 1.55           |
| <i>Whole-brain proportions of node types</i> |             |             |                |
| ultra-peripheral nodes                       | .09         | .145        | 1.34           |
| peripheral nodes                             | .05         | .420        | 2.74           |
| non-hub connector nodes                      | -.03        | .616        | 3.29           |
| non-hub kinless nodes                        | .04         | .521        | 3.06           |
| provincial hubs                              | .04         | .518        | 3.05           |
| connector hubs                               | -.03        | .616        | 3.29           |
| kinless hubs                                 | .03         | .672        | 3.40           |

$r_{part.}$ , Pearson's correlation coefficient for the partial correlation controlling for effects of age, sex, and handedness;  $p_{part.}$ ,  $p$ -value of significance for the partial-correlation;  $BF_{01-Reg.}$ , Bayes Factor in favour of the null hypothesis (i.e., absence of correlation) for Bayes linear regression models predicting FSIQ values by the respective whole-brain measure of modular network organization or whole-brain proportions of node types while controlling for effects of age, sex, and handedness.

**Supplementary Table S5.** Intelligence-related effects in weighted within-module and between-module connectivity.

| Brain Region                                                                                   | BA     | Hem | x   | y   | z  | $t_{max}$ | $k$ |
|------------------------------------------------------------------------------------------------|--------|-----|-----|-----|----|-----------|-----|
| <i>A: Weighted participation coefficient <math>p_{iw}</math> (between-module connectivity)</i> |        |     |     |     |    |           |     |
| <i>positive association</i>                                                                    |        |     |     |     |    |           |     |
| anterior insula*                                                                               | 47, 13 | R   | 36  | 33  | -6 | 4.03      | 58  |
| cuneus                                                                                         | 30, 23 | L   | -9  | -72 | 6  | 3.36      | 32  |
| middle occipital gyrus                                                                         | 17, 18 | L   | -18 | -93 | -3 | 3.65      | 130 |
| <i>negative association</i>                                                                    |        |     |     |     |    |           |     |
| superior frontal gyrus*                                                                        | 10     | R/L | 3   | 63  | 12 | -2.62     | 61  |
| inferior parietal lobule                                                                       | 40     | L   | -42 | -39 | 39 | -2.60     | 28  |
| temporo-parietal junction*                                                                     | 39, 40 | L   | -48 | -66 | 30 | -2.60     | 136 |
| <i>B: Weighted within-module degree <math>z_{iw}</math> (within-module connectivity)</i>       |        |     |     |     |    |           |     |
| <i>positive association</i>                                                                    |        |     |     |     |    |           |     |
| superior frontal gyrus*                                                                        | 10, 9  | R/L | -15 | 54  | 36 | 3.97      | 300 |
| superior frontal gyrus                                                                         | 8      | L   | -12 | 33  | 51 | 3.23      | 31  |
| middle frontal gyrus                                                                           | 9, 8   | L   | -45 | 21  | 42 | 3.94      | 61  |
| inferior precentral gyrus /<br>superior temporal gyrus                                         | 22, 44 | L   | -54 | 0   | 6  | 3.49      | 34  |
| inferior frontal gyrus / inferior<br>precentral gyrus                                          | 44, 13 | R   | 45  | 3   | 21 | 3.43      | 40  |
| superior parietal lobule                                                                       | 5, 7   | L   | -27 | -48 | 69 | 3.04      | 35  |
| temporo-parietal junction*                                                                     | 39     | L   | -51 | -66 | 27 | 4.35      | 217 |
| temporo-parietal junction                                                                      | 39     | R   | 57  | -63 | 33 | 4.28      | 67  |
| <i>negative association</i>                                                                    |        |     |     |     |    |           |     |
| anterior insula*                                                                               | 47, 13 | R   | 36  | 30  | -3 | -2.56     | 75  |
| superior precentral gyrus                                                                      | 4, 3   | L   | -15 | -18 | 63 | -2.59     | 80  |
| superior precentral gyrus /<br>supplementary motor area                                        | 6, 4   | R   | 39  | -18 | 54 | -2.61     | 139 |

|                 |  |   |     |     |     |       |    |
|-----------------|--|---|-----|-----|-----|-------|----|
| hippocampus     |  | L | -33 | -27 | -12 | -2.60 | 73 |
| hippocampus     |  | R | 27  | -15 | -9  | -2.60 | 36 |
| caudate nucleus |  | L | -9  | 27  | 0   | -2.65 | 52 |

C: Conjunction between weighted *participation coefficient*  $p_{iw}$  and *weighted within-module degree*  $z_{iw}$

|                           |        |     |     |     |    |  |    |
|---------------------------|--------|-----|-----|-----|----|--|----|
| superior frontal gyrus    | 10     | R/L | 3   | 63  | 12 |  | 61 |
| anterior insula           | 47, 13 | R   | 33  | 27  | -9 |  | 41 |
| temporo-parietal junction | 39, 40 | L   | -57 | -69 | 21 |  | 98 |

---

BA, approximate Brodmann's area; Hem, hemisphere; L, left; R, right; regions with intelligence-related effects in both measures (between-module and within-module connectivity) are marked with an asterisk and separately listed in (C); coordinates refer to the Montreal Neurological Institute template brain (MNI);  $t_{max}$ , maximum  $t$  statistic in the cluster;  $k$ , cluster size in voxels of size 3x3x3mm.



**Supplementary Figure 1.** Clusters of nodes where intelligence (WASI FSIQ) was significantly associated with between-module or within-module connectivity for each of 5 different graph threshold.

**positive association between intelligence and between-module connectivity**

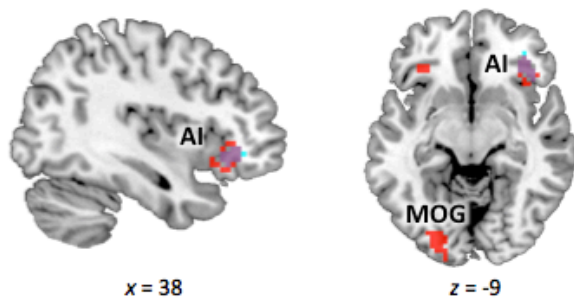

**negative association between intelligence and between-module connectivity**

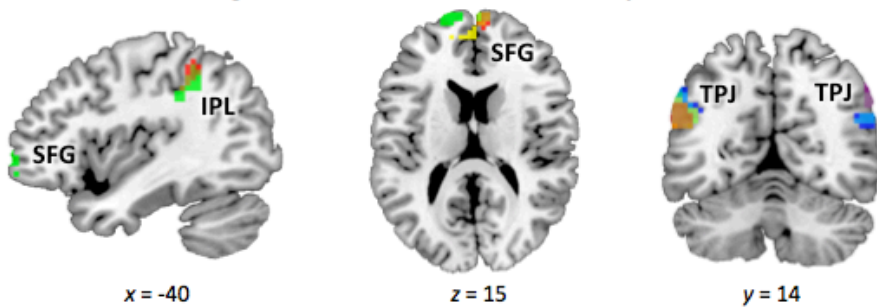

**positive association between intelligence and within-module connectivity**

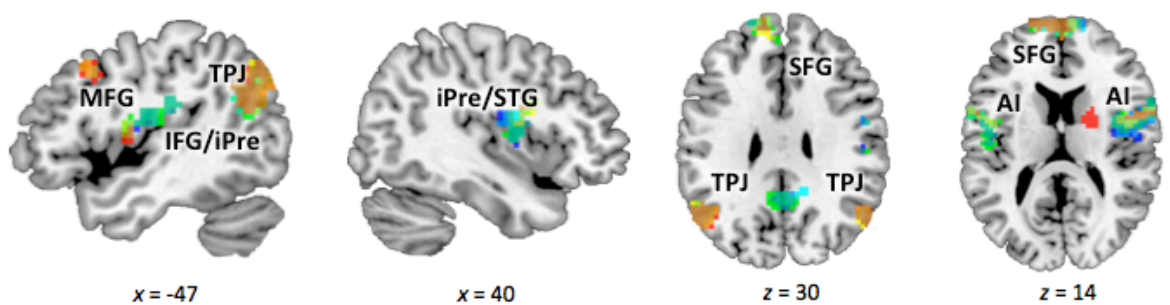

**negative association between intelligence and within-module connectivity**

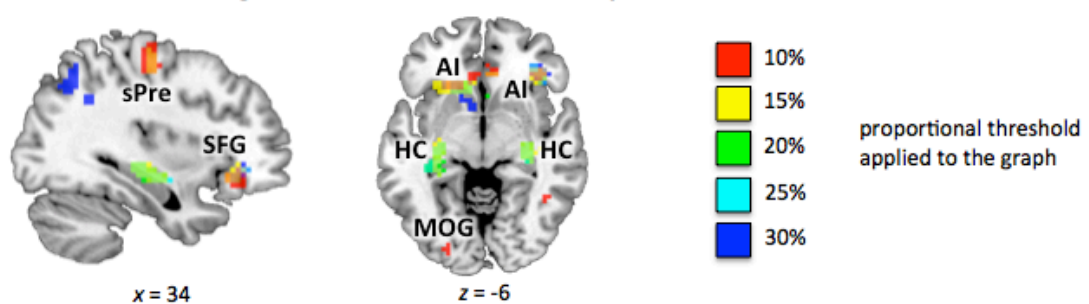

Between-module connectivity was operationalized by *participation coefficient*  $p_i$ , within-module connectivity by *within-module degree*  $z_i$  (see Methods for details). Statistic parametric maps for both measures are shown at a voxel-level threshold of  $p < .005$ , uncorrected, and a cluster-level threshold of  $k > 26$  voxels, corresponding to an overall threshold of  $p < .05$ , family-wise corrected for multiple comparisons (see Methods). SFG, superior frontal gyrus; AI, anterior insula; MFG, middle frontal gyrus; IFG, inferior frontal gyrus; HC, Hippocampus; iPre, inferior precentral gyrus; sPre, superior precentral gyrus; STG, superior temporal gyrus; TPJ, temporo-parietal junction; SPL, superior parietal lobule; IPL, inferior parietal lobule; MOG, middle occipital gyrus. The  $x$ -,  $y$ - and  $z$ -coordinates represent coordinates of the Montreal Neurological Institute template brain (MNI152).
